# Supplementary material for: Influence of Sink Size on 15N and 13C Allocation during Different Phenological Phases of Spring Wheat Cultivars
Source: MDPI journal article supplement (doi:10.3390/nitrogen4010004), 2023-01-19
Supplement: s1 [file s1]

Archive with 1 entries (1 files):
- nitrogen-2124851-supplementary.pdf
