# Supplementary material for: Influence of Sink Size on 15N and 13C Allocation during Different Phenological Phases of Spring Wheat Cultivars
Source: MDPI journal article supplement (doi:10.3390/nitrogen4010004), 2023-01-19
Supplement: s1 [file s1 › nitrogen-2124851-supplementary.pdf]

**Supplemental material Table S1:** Mean monthly air temperature ( $T_{\text{mean}}$ ), minimum ( $T_{\text{min}}$ ), and maximum ( $T_{\text{max}}$ ) temperature ( $^{\circ}\text{C}$ ) at the weather station in Berlin-Dahlem ( $52.47^{\circ}$  N,  $13.30^{\circ}$  E,  $h = 51$  m) during the experimental phase in 2018. Data in square brackets representing data of the reference period 1991-2020.

| Month | $T_{\text{mean}}$ ( $^{\circ}\text{C}$ ) | $T_{\text{min}}$ ( $^{\circ}\text{C}$ ) | $T_{\text{max}}$ ( $^{\circ}\text{C}$ ) |
|-------|------------------------------------------|-----------------------------------------|-----------------------------------------|
| March | 2.2 [5.2]                                | -1.5 [1.7]                              | 6.9 [9.1]                               |
| April | 13.9 [10.5]                              | 8.2 [5.5]                               | 19.7 [15.4]                             |
| May   | 19.0 [14.9]                              | 11.2 [9.4]                              | 26.2 [20.0]                             |
| June  | 20.0 [18.2]                              | 14.3 [12.7]                             | 25.4 [23.1]                             |
| July  | 22.5 [20.1]                              | 14.6 [14.9]                             | 29.8 [25.4]                             |
